# Supplementary material for: The energetically favorable cis peptide bond for the azaglycine-containing peptide: For-AzGly-NH2 model
Source: Royal Society of Chemistry journal article supplement (doi:10.1039/b009651m), 2001-01-01
Supplement: tables.doc [file tables.doc]

**Supplemental Material**

**Table S1**. Relative Energies (E(0K), in kcal/mol), Relative Enthalpy Energies (H(298K), in kcal/mol) and Relative Free Energies (G(298K), in kcal/mol) for the Minimum Energy Conformations of **1** in the Gas Phase.

| Method/Basis sets | E (0 K) | | | |  | H (298K) a | | | |  | G (298K) a | | | |
| --- | --- | --- | --- | --- | --- | --- | --- | --- | --- | --- | --- | --- | --- | --- |
|  | **1a-I** | **1a-II** | **1b-I** | **1b-II** |  | **1a-I** | **1a-II** | **1b-I** | **1b-II** |  | **1a-I** | **1a-II** | **1b-I** | **1b-II** |
|  |  |  |  |  |  |  |  |  |  |  |  |  |  |  |
| HF/6-31G* | 1.20 | 1.39 | 0.00 | 0.95 |  | 1.37 | 1.51 | 0.00 | 1.13 |  | 1.45(1.67)b | 1.50(1.57) | 0.00 (0.00) | 1.20 (1.41) |
| HF/6-31G** | 1.32 | 1.57 | 0.00 | 1.19 |  | 1.47 | 1.60 | 0.00 | 1.31 |  | 1.60 (1.82) | 1.61 (1.67) | 0.00 (0.00) | 1.45 (1.65) |
| HF/6-31+G** | 1.42 | 1.51 | 0.00 | 1.51 |  | 1.60 | 1.62 | 0.00 | 1.59 |  | 1.84 (2.13) | 1.74 (1.89) | 0.00 (0.00) | 1.78 (1.98) |
| HF/6-311G** | 1.15 | 1.31 | 0.00 | 0.97 |  | 1.30 | 1.37 | 0.00 | 1.10 |  | 1.42 (1.65) | 1.35 (1.40) | 0.00 (0.00) | 1.22 (1.44) |
| B3LYP/6-31G* | 0.78 | 2.72 | 0.00 | 1.46 |  | 0.92 | 2.07 | 0.00 | 1.59 |  | 1.00 (1.22) | 1.83 (1.87) | 0.00 (0.00) | 1.60 (1.76) |
| B3LYP /6-31G** | 0.86 | 2.04 | 0.00 | 1.60 |  | 0.99 | 2.13 | 0.00 | 1.71 |  | 1.05 (1.25) | 1.78 (1.76) | 0.00 (0.00) | 1.69 (1.83) |
| B3LYP /6-31+G** | 1.07 | 1.95 | 0.00 | 2.01 |  | 1.21 | 2.08 | 0.00 | 2.09 |  | 1.37 (1.63) | 1.87 (1.96) | 0.00 (0.00) | 2.14 (2.28) |
| B3LYP /6-311G** | 0.97 | 2.24 | 0.00 | 1.75 |  | 1.08 | 2.28 | 0.00 | 1.85 |  | 1.19 (1.38) | 1.81 (1.71) | 0.00 (0.00) | 1.89 (2.04) |
| MP2/6-31G* | 0.05 | 0.95 | 0.00 | 0.84 |  | 0.20 | 1.09 | 0.00 | 0.97 |  | 0.31 (0.54) | 1.08 (1.19) | 0.00 (0.00) | 0.98 (1.14) |
| MP2/6-31G** | 0.05 | 0.91 | 0.00 | 0.87 |  | 0.17 | 1.00 | 0.00 | 0.96 |  | 0.27 (0.47) | 0.95 (1.01) | 0.00 (0.00) | 0.94 (1.06) |
| MP2/6-31+G** | 0.12 | 0.63 | 0.00 | 1.26 |  | 0.29 | 0.81 | 0.00 | 1.37 |  | 0.35 (0.59) | 0.83 (1.02) | 0.00 (0.00) | 1.31 (1.40) |
| MP2/6-311G** | 0.05 | 1.05 | 0.00 | 0.72 |  | 0.18 | 1.12 | 0.00 | 0.84 |  | 0.26 (0.46) | 1.01 (1.01) | 0.00 (0.00) | 0.80 (0.94) |
|  |  |  |  |  |  |  |  |  |  |  |  |  |  |  |

aIncludes corrections for thermal energy without zero-point energy correction b Includes corrections for thermal energy and entropy with zero-point energy correction in parenthesis.

**Table S2**. The Selected Geometries and Wiberg Bond Order (in parenthesis) of Minimum Energy Conformations for **1** and **2** at the B3LYP/6-31+G** level.

| **For-AzGly-NH2** | **1a-I** | **1a-II** |  | **1b-I** | **1b-II** |  | **For-Gly-NH2** | **2a-I** | **2a-II** |  | **2b-I** | **2b-II** |
| --- | --- | --- | --- | --- | --- | --- | --- | --- | --- | --- | --- | --- |
|  |  |  |  |  |  |  |  |  |  |  |  |  |
| Bond lengths |  |  |  |  |  |  | Bond lengths |  |  |  |  |  |
| C1-O1 | 1.214  (1.75)a | 1.217  (1.72) |  | 1.216  (1.74) | 1.215  (1.74) |  | C1-O1 | 1.226  (1.67) | 1.229  (1.64) |  | 1.219  (1.71) | 1.222  (1.70) |
| C1-N1 | 1.380  (1.15) | 1.373  (1.17) |  | 1.378  (1.14) | 1.379  (1.14) |  | C1-N1 | 1.355  (1.22) | 1.355  (1.24) |  | 1.369  (1.18) | 1.358  (1.21) |
| N1-N | 1.391  (1.02) | 1.386  (1.03) |  | 1.385  (1.02) | 1.387  (1.03) |  | N1-C | 1.444  (0.98) | 1.462  (0.96) |  | 1.452  (0.97) | 1.445  (0.98) |
| N-C2 | 1.408  (1.04) | 1.408  (1.04) |  | 1.403  (1.05) | 1.407  (1.04) |  | C-C2 | 1.529  (0.97) | 1.541  (0.94) |  | 1.537  (0.95) | 1.533  (0.97) |
| C2-O2 | 1.222  (1.65) | 1.220  (1.66) |  | 1.223  (1.64) | 1.219  (1.67) |  | C2-O2 | 1.227  (1.67) | 1.226  (1.67) |  | 1.224  (1.68) | 1.224  (1.68) |
| C2-N2 | 1.369  (1.16) | 1.376  (1.15) |  | 1.366  (1.17) | 1.379  (1.14) |  | C2-N2 | 1.360  (1.22) | 1.358  (1.24) |  | 1.359  (1.22) | 1.361  (1.22) |
| Bond angles |  |  |  |  |  |  | Bond angles |  |  |  |  |  |
| C1N1H2 | 118.1 | 119.9 |  | 117.9 | 116.9 |  | C1N1H2 | 121.7 | 118.3 |  | 115.4 | 119.1 |
| C1N1N | 121.5 | 120.6 |  | 120.7 | 119.3 |  | C1N1C | 122.0 | 123.1 |  | 124.6 | 124.6 |
| H2N1N | 115.3 | 115.5 |  | 119.4 | 117.5 |  | H2N1C | 116.2 | 118.6 |  | 119.0 | 116.3 |
| N1 | 354.9 | 356.0 |  | 358.0 | 353.7 |  | N1 | 359.9 | 360.0 |  | 359.0 | 360.0 |
| N1NC2 | 120.8 | 116.9 |  | 121.7 | 117.6 |  | N1CC2 | 108.9 | 114.0 |  | 116.3 | 122.0 |
| N1NH3 | 115.0 | 112.6 |  | 117.3 | 113.6 |  |  |  |  |  |  |  |
| C2NH3 | 111.9 | 118.3 |  | 113.2 | 116.6 |  |  |  |  |  |  |  |
| N | 347.7 | 347.8 |  | 352.2 | 347.8 |  |  |  |  |  |  |  |
| C2N2H4 | 115.1 | 114.2 |  | 116.3 | 114.2 |  | C2N2H4 | 118.5 | 118.4 |  | 118.5 | 118.3 |
| C2N2H5 | 120.2 | 120.4 |  | 121.7 | 119.3 |  | C2N2H5 | 122.6 | 121.0 |  | 121.7 | 122.8 |
| H4N2H5 | 117.8 | 115.8 |  | 119.0 | 115.6 |  | H4N2H5 | 118.9 | 120.5 |  | 119.7 | 118.8 |
| N2 | 353.1 | 350.4 |  | 357.0 | 349.1 |  | N2 | 360.0 | 360.0 |  | 359.9 | 359.9 |
|  |  |  |  |  |  |  |  |  |  |  |  |  |

a Wiberg Bond order
